# Supplementary material
Source: PubMed Central journal article supplement (PMC4564949)
Supplement: NIHMS64979-supplement-Supplementary_material.pdf [file NIHMS64979-supplement-Supplementary_material.pdf]

**Supplemental Table 1. LRIM9 is a novel antagonist of *P. berghei* in susceptible mosquitoes**

| Expt   | Knock-down   | N  | Live oocysts |         |                     |         | Knockdown efficiency (%) |
|--------|--------------|----|--------------|---------|---------------------|---------|--------------------------|
|        |              |    | Prevalence   |         | Infection intensity |         |                          |
|        |              |    | %            | P-value | Median (Range)      | P-value |                          |
| 1      | <i>GFP</i>   | 7  | 86           | N/A     | 6 (0-19)            | N/A     | N/A                      |
|        | <i>LRIM1</i> | 4  | 100          | NS      | 519 (307-751)       | < 0.001 | 72                       |
|        | <i>LRIM9</i> | 10 | 100          | NS      | 26 (4-608)          | < 0.05  | 81                       |
| 2      | <i>GFP</i>   | 16 | 75           | N/A     | 3.5 (0-22)          | N/A     | N/A                      |
|        | <i>LRIM1</i> | 13 | 100          | NS      | 326 (225-748)       | < 0.001 | 95                       |
|        | <i>LRIM9</i> | 17 | 59           | NS      | 1 (0-183)           | NS      | 86                       |
| 3      | <i>GFP</i>   | 33 | 88           | N/A     | 13 (0-298)          | N/A     | N/A                      |
|        | <i>TEP1</i>  | 20 | 95           | NS      | 240 (0-700)         | < 0.001 | ND                       |
|        | <i>LRIM9</i> | 42 | 95           | NS      | 43 (0-293)          | < 0.05  | ND                       |
| Pooled | <i>GFP</i>   | 56 | 84           | N/A     | 8 (0-298)           | N/A     | N/A                      |
|        | <i>LRIM1</i> | 17 | 100          | NS      | 357 (225-751)       | < 0.001 | 81                       |
|        | <i>TEP1</i>  | 20 | 95           | NS      | 240 (0-700)         | < 0.001 | ND                       |
|        | <i>LRIM9</i> | 69 | 87           | NS      | 23 (0-608)          | < 0.05  | 84                       |

*LRIM9* was silenced using RNAi, susceptible N'gousso strain mosquitoes were infected with fluorescent *P. berghei* and parasite load was monitored after 7 days. Non-specific *GFP* dsRNA was used as a negative control and *LRIM1* or *TEP1* as positive controls. Three independent biological replicates and pooled data are shown. *N* is the number of individual mosquito midguts. The Kruskal-Wallis test with Dunn's post-test was used for infection intensity, comparing to ds*GFP*. Fisher's exact test was used for prevalence. Significant P-values (< 0.05) are shown in red. Knockdown efficiency was calculated by qRT-PCR. NS, ND and N/A are not significant, not determined and not applicable, respectively.

**Supplemental Table 2. *LRIM9* silencing reduces melanization of *P. berghei* parasites in refractory L3-5 mosquitoes**

| Expt | Knock-down   | N  | Live oocysts |         |                     |         | Melanized ookinetes |         |                     |         | Knockdown efficiency (%) |
|------|--------------|----|--------------|---------|---------------------|---------|---------------------|---------|---------------------|---------|--------------------------|
|      |              |    | Prevalence   |         | Infection intensity |         | Prevalence          |         | Infection intensity |         |                          |
|      |              |    | %            | P-value | Median (Range)      | P-value | %                   | P-value | Median (Range)      | P-value |                          |
| 1    | <i>GFP</i>   | 43 | 0            | N/A     | 0                   | N/A     | 74                  | N/A     | 7 (0-65)            | N/A     | N/A                      |
|      | <i>LRIM9</i> | 45 | 4            | NS      | 0 (0-1)             | NS      | 66                  | NS      | 1 (0-28)            | < 0.01  | 89                       |
| 2    | <i>GFP</i>   | 57 | 2            | N/A     | 0 (0-1)             | N/A     | 33                  | N/A     | 0 (0-68)            | N/A     | N/A                      |
|      | <i>LRIM9</i> | 58 | 0            | NS      | 0                   | NS      | 19                  | NS      | 0 (0-11)            | NS      | ND                       |

*LRIM9* was silenced using RNAi, L3-5 refractory mosquitoes were infected with fluorescent *P. berghei* and parasite load was monitored after 7 days. Two independent biological replicates are shown. Non-specific *GFP* dsRNA was used as a negative control. *N* is the number of individual mosquito midguts. The Mann-Whitney test was used for infection intensity, comparing to ds*GFP*. Fisher's exact test was used for prevalence. Significant P-values (< 0.01) are shown in red. Knockdown efficiency was calculated by qRT-PCR. NS, ND and N/A are not significant, not determined and not applicable, respectively.

**Supplemental Table 3. *LRIM9* and *CTL4* silencing in susceptible mosquitoes**

| Expt | Knock-down        | N  | Live oocysts |          |                     |         | Melanized ookinetes |          |                     |         | Knockdown efficiency (%) |
|------|-------------------|----|--------------|----------|---------------------|---------|---------------------|----------|---------------------|---------|--------------------------|
|      |                   |    | Prevalence   |          | Infection intensity |         | Prevalence          |          | Infection intensity |         |                          |
|      |                   |    | %            | P-value  | Median (Range)      | P-value | %                   | P-value  | Median (Range)      | P-value |                          |
| 1    | <i>GFP</i>        | 8  | 88           | N/A      | 6.5 (0-23)          | N/A     | 0                   | N/A      | 0                   | N/A     | N/A                      |
|      | <i>CTL4</i>       | 9  | 33           | < 0.05   | 0 (0-3)             | NS      | 56                  | < 0.05   | 1 (0-17)            | NS      | ND                       |
|      | <i>CTL4/TEP1</i>  | 9  | 78           | NS       | 43 (0-66)           | < 0.05  | 0                   | < 0.05   | 0                   | < 0.05  | 66                       |
|      | <i>CTL4/LRIM9</i> | 10 | 70           | NS       | 1.5 (0-26)          | N/A     | 30                  | NS       | 0 (0-18)            | NS      | 76                       |
| 2    | <i>GFP</i>        | 37 | 49           | N/A      | 0 (0-168)           | N/A     | 14                  | N/A      | 0 (0-6)             | N/A     | N/A                      |
|      | <i>CTL4</i>       | 32 | 19           | < 0.05   | 0 (0-37)            | NS      | 69                  | < 0.0001 | 0 (8-583)           | < 0.001 | ND                       |
|      | <i>CTL4/TEP1</i>  | 27 | 93           | < 0.0001 | 130 (0-497)         | < 0.001 | 11                  | < 0.0001 | 0 (0-2)             | < 0.001 | ND                       |
|      | <i>CTL4/LRIM9</i> | 23 | 39           | NS       | 0 (0-19)            | NS      | 65                  | NS       | 4 (0-371)           | NS      | ND                       |

Genes were silenced using RNAi, susceptible N'gousso strain mosquitoes were infected with fluorescent *P. berghei* and parasite load was monitored after 7 days. Two independent biological replicates and pooled data are shown. Non-specific *GFP* dsRNA was used as a negative control and *LRIM1* or *TEP1* as positive controls. *N* is the number of individual mosquito midguts. The Kruskal-Wallis test with Dunn's post-test was used for infection intensity, comparing to ds*CTL4* (for ds*CTL4/TEP1* and ds*CTL4/LRIM9*) and ds*GFP* (for ds*CTL4*). Fisher's exact test was used for prevalence. Significant P-values (< 0.05) are shown in red. Knockdown efficiency was calculated by qRT-PCR. NS, ND and N/A are not significant, not determined and not applicable, respectively.

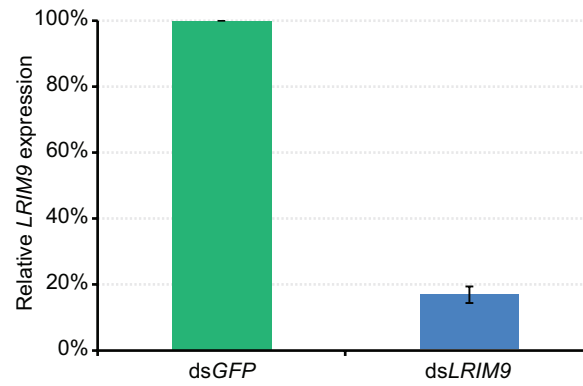

**Supplemental Fig. 1**

**Fig. S1. Knockdown efficiency for *LRIM9* transcript.** RNA was extracted from 10 mosquitoes after *dsGFP* or *dsLRIM9* injection and cDNA synthesized. *LRIM9* expression was determined using qRT-PCR and normalized to ribosomal *S7*. *LRIM9* expression in *dsLRIM9*-treated mosquitoes was calculated relative to expression in *dsGFP*-treated mosquitoes. Mean efficiency from two independent experiments is shown with standard error bars.

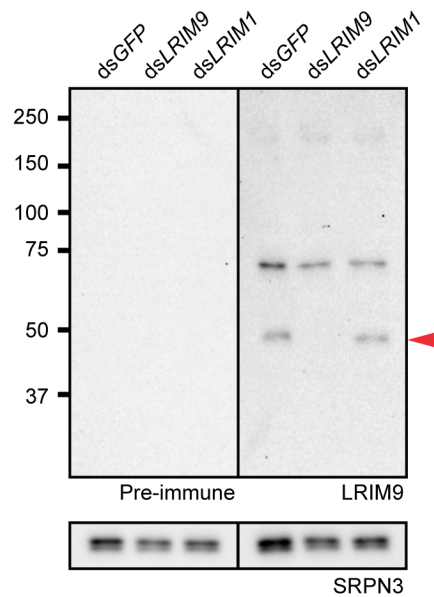

**Supplemental Fig. 2**

**Fig. S2. Development of an LRIM9 antibody.** Mosquitoes were injected with *dsGFP*, *dsLRIM9* or *dsLRIM1* and hemolymph was collected after 4 days. Non-reduced hemolymph was analyzed by western blot and probed with pre-immune serum or the LRIM9 antibody. A unique band at approximately 50 kDa was detected in *dsGFP*- and *dsLRIM1*-treated mosquitoes but was absent in *dsLRIM9* and the preimmune serum (see red arrowhead). Blots were re-probed with a SRPN3 antibody as a loading control.

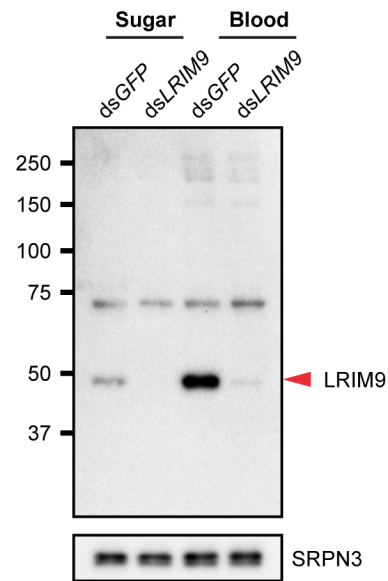

**Supplemental Fig. 3**

**Fig. 3. Induction of LRIM9 protein by blood feeding is prevented by gene silencing.** Three days after *GFP* or *LRIM9* silencing, mosquitoes were fed either sugar or murine blood. Hemolymph collected 24 h later was analyzed by western blot using antibodies against LRIM9 and SRPN3 (as a loading control). LRIM9 protein is shown at approximately 50 kDa (red arrowhead). A band at approximately 70 kDa and another faint cluster of bands between 180 and 250 kDa were unaffected by *LRIM9* silencing and therefore considered non-specific.

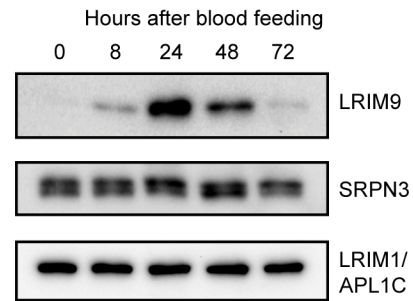

**Supplemental Fig. 4**

**Fig. S4. LRIM9 protein is induced after feeding on human blood.** Mosquitoes were allowed to feed on human blood and hemolymph was collected after 8, 24, 48 and 72 hours. Hemolymph was analyzed by western blot under non-reducing conditions and probed with antibodies against LRIM9, SRPN3 (as a loading control) and APL1C (to detect the LRIM1/APL1C complex).
